# Supplementary material
Source: PubMed Central journal article supplement (PMC3608848)

### Treatment Schematic

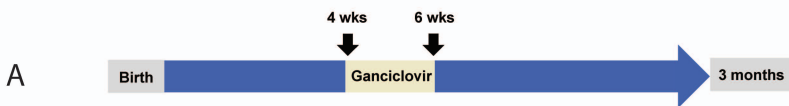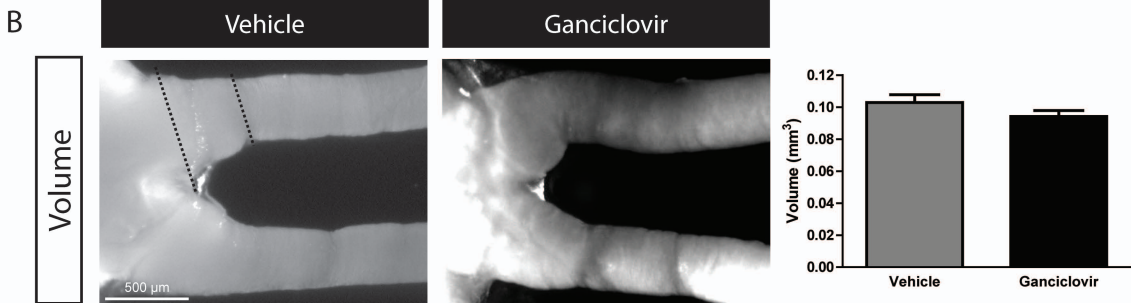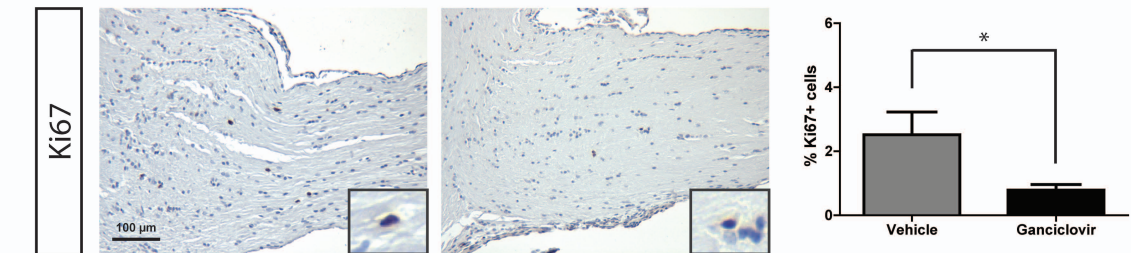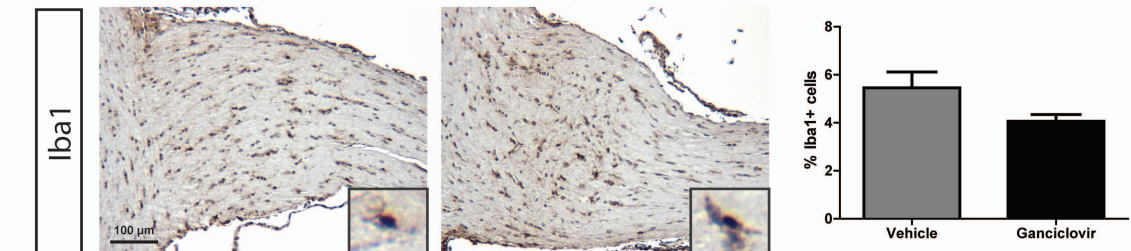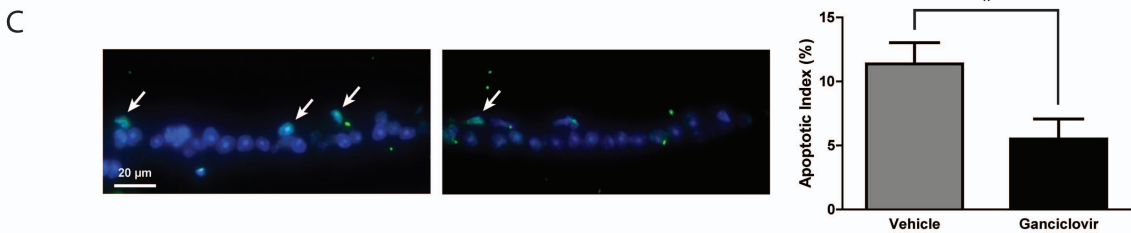

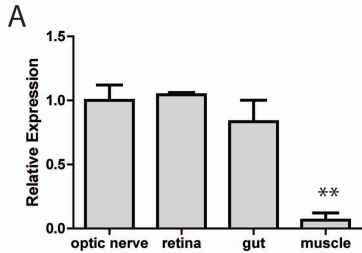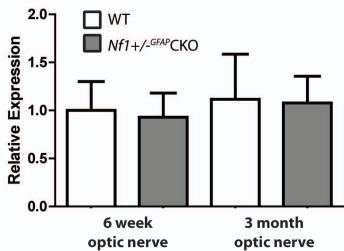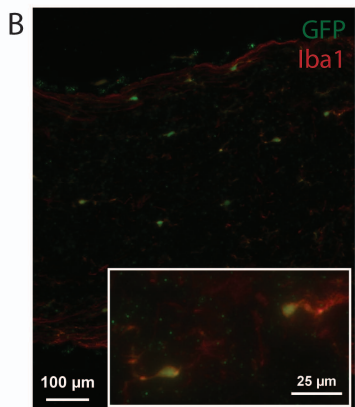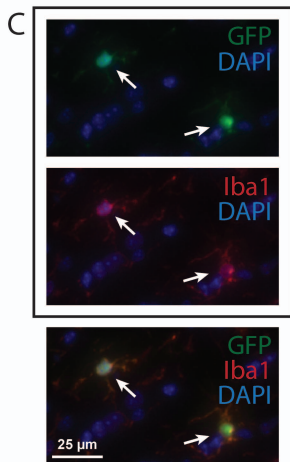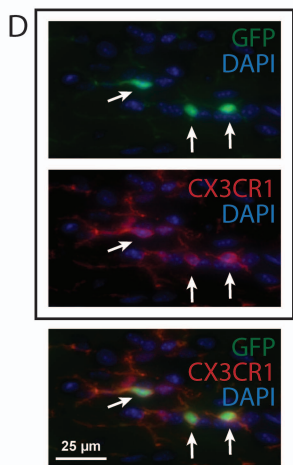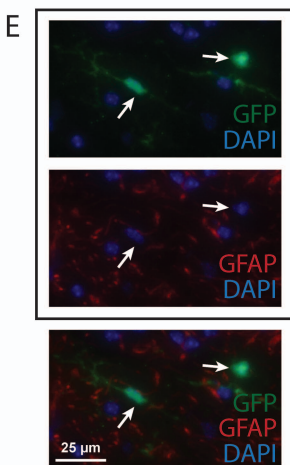

A

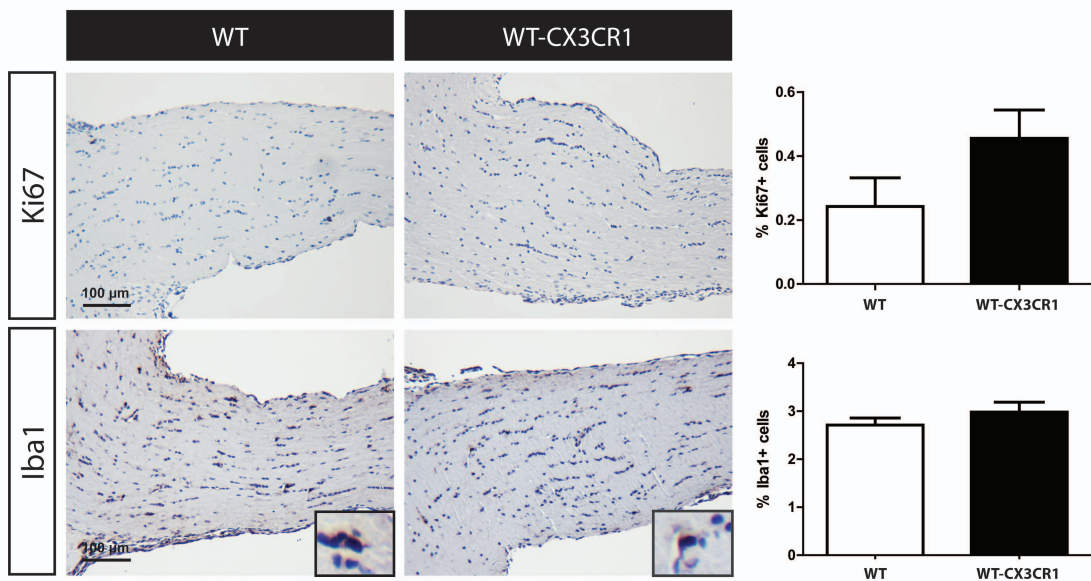

B

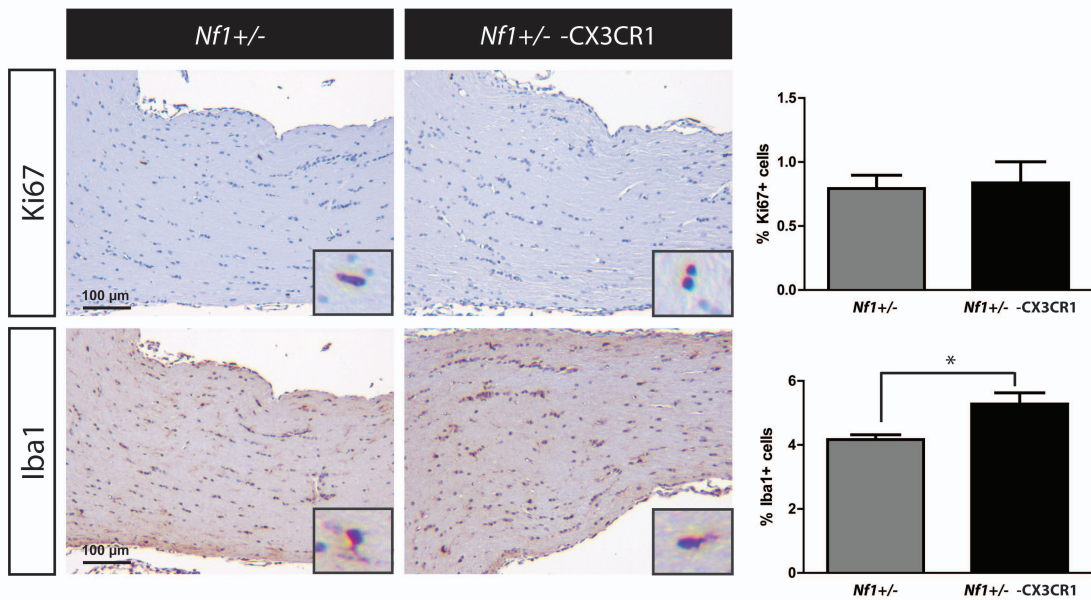

A

WT

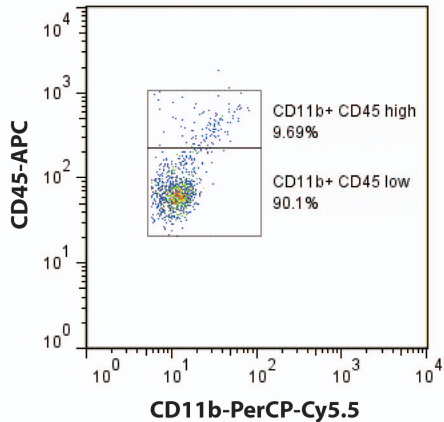

B

*Nf1*<sup>+/-GFAP</sup>CKO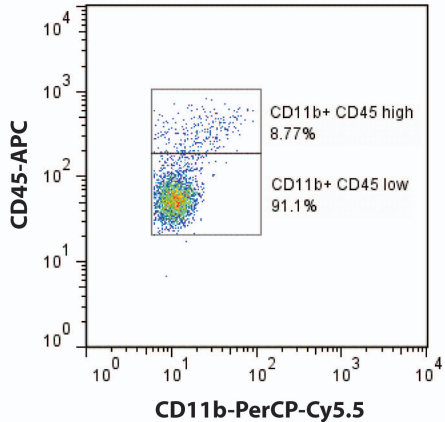

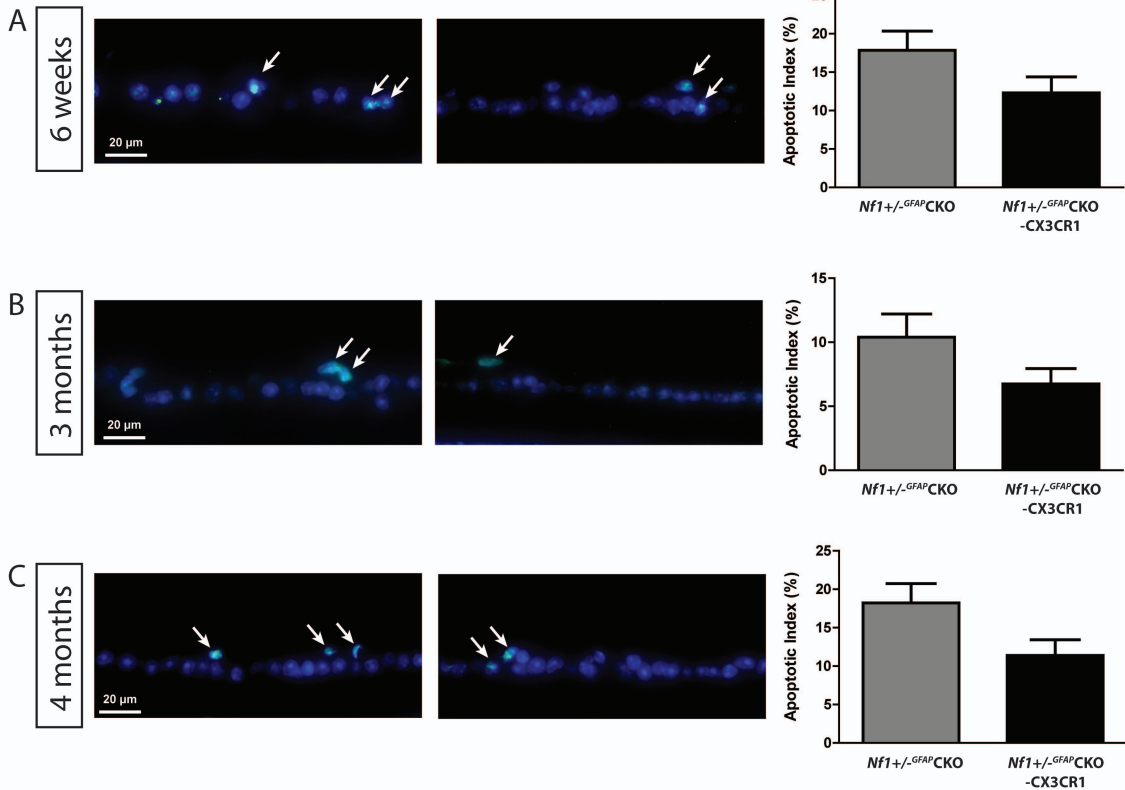

Supplement: NIHMS422671-supplement-Supp_Fig_S1-S5.pdf [file NIHMS422671-supplement-Supp_Fig_S1-S5.pdf]
